# Supplementary material
Source: Springer Nature journal article supplement (https://www.springermedizin.de/resource/supplementary/13633_2011_22_MOESM3_ESM.pdf/9595530)

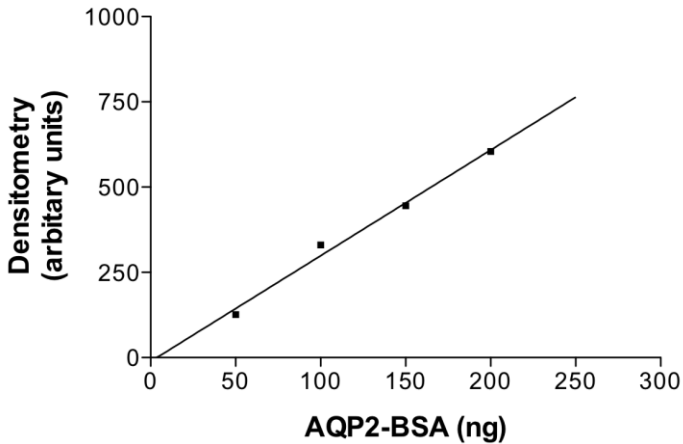

Supplement: MOESM3 [file 9595530]
